# Supplementary material for: Analysis of Diurnal Evolution of Cloud Properties and Convection Tracking over the South China Coastal Area
Source: MDPI journal article supplement (doi:10.3390/rs14195039), 2022-10-09
Supplement: s1 [file s1]

## Supplementary Materials

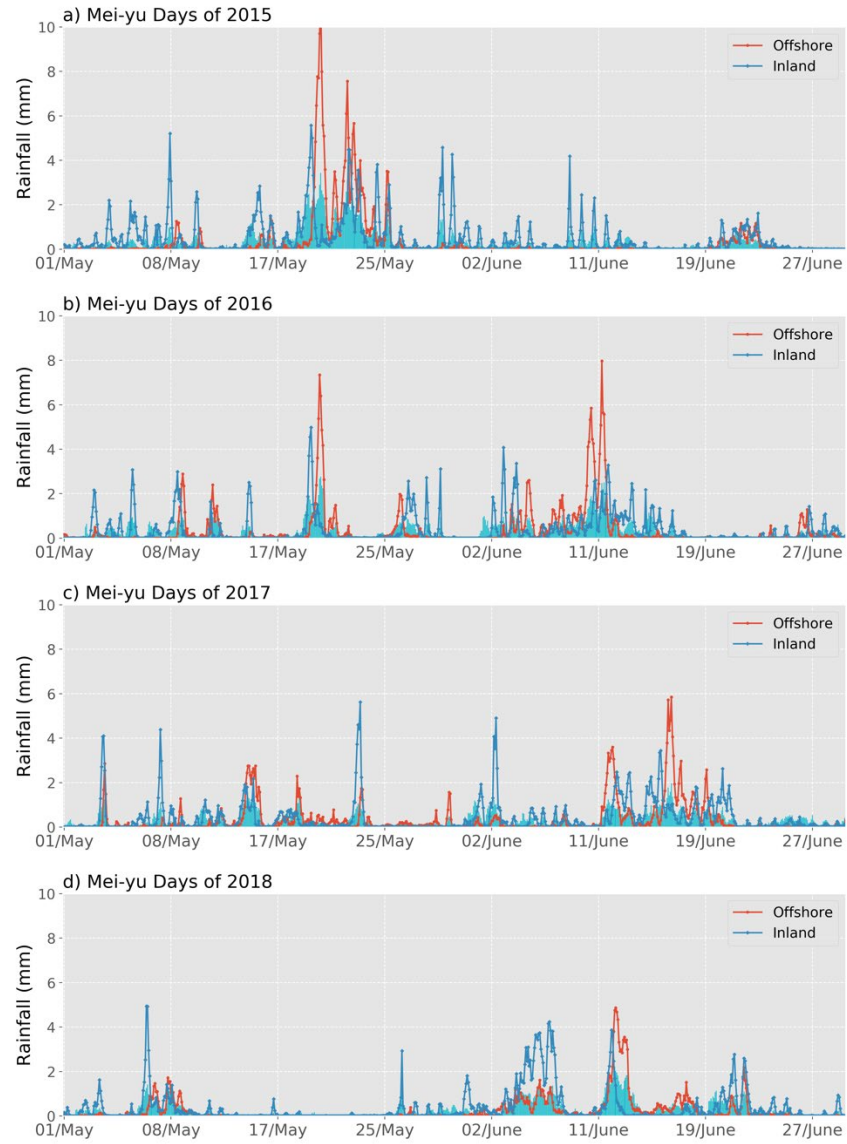

**Figure S1.** Rainfall amount during the Mei-yu season, from 2015 to 2018. The results are shown for the whole South China coastal area, offshore region, and inland region, as denoted by the cyan bar and blue and red dotted lines, respectively.
